# Supplementary material
Source: Springer Nature journal article supplement (https://www.springermedizin.de/resource/supplementary/12906_2008_197_MOESM8_ESM.pdf/9524252)

A

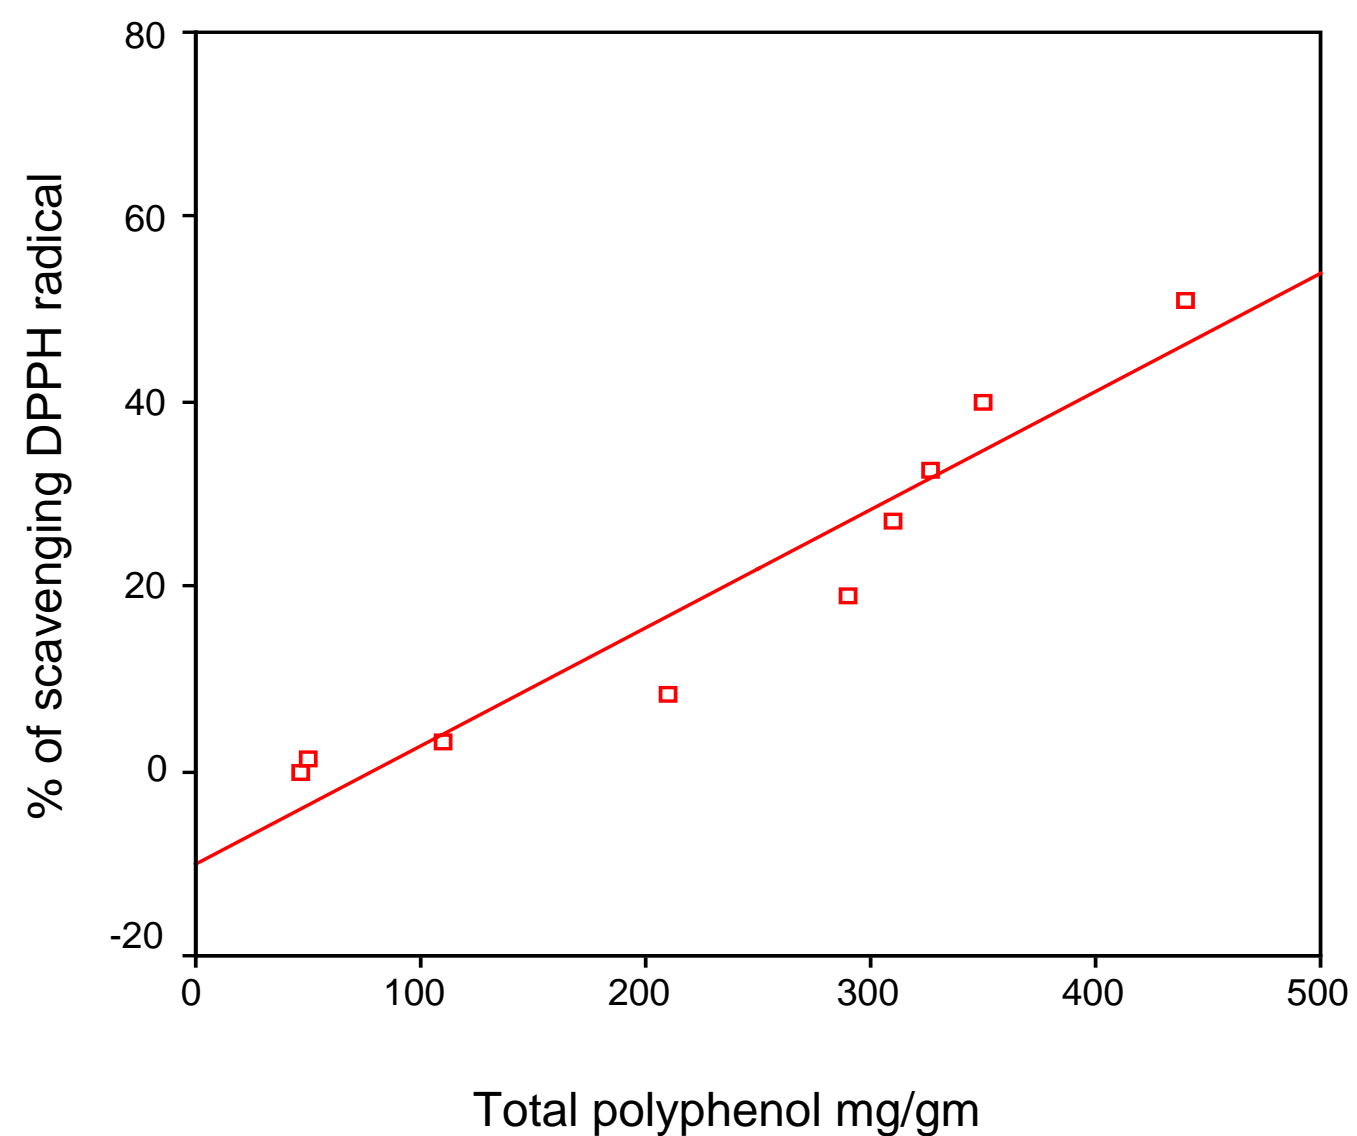

Rsq = 0.9514

D

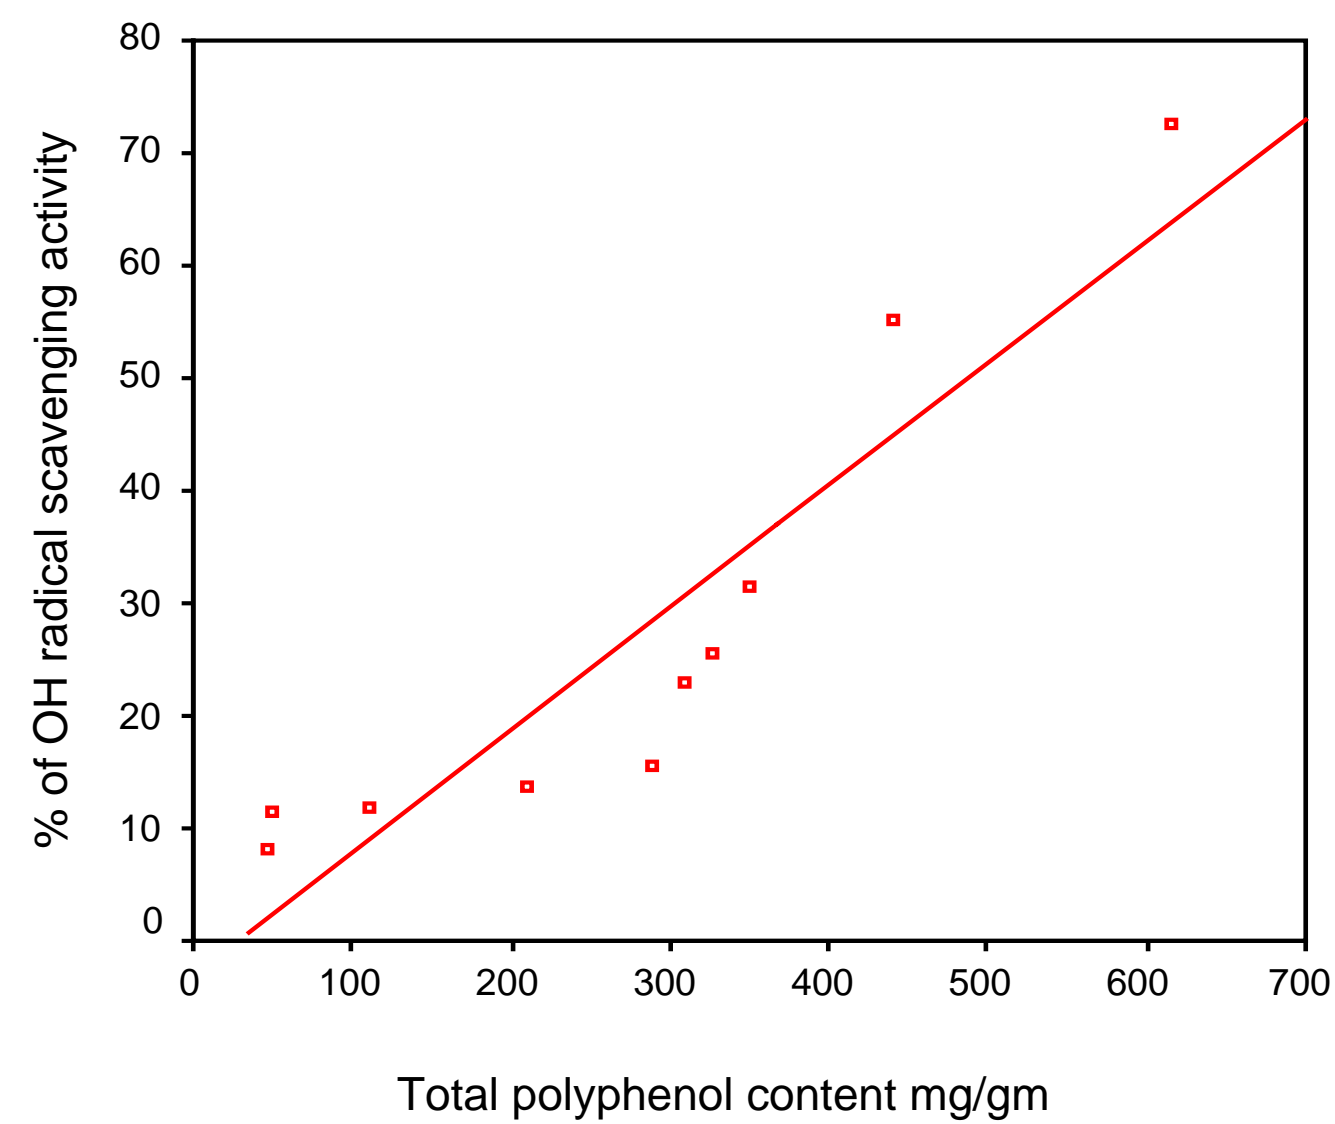

Rsq = 0.8463

B

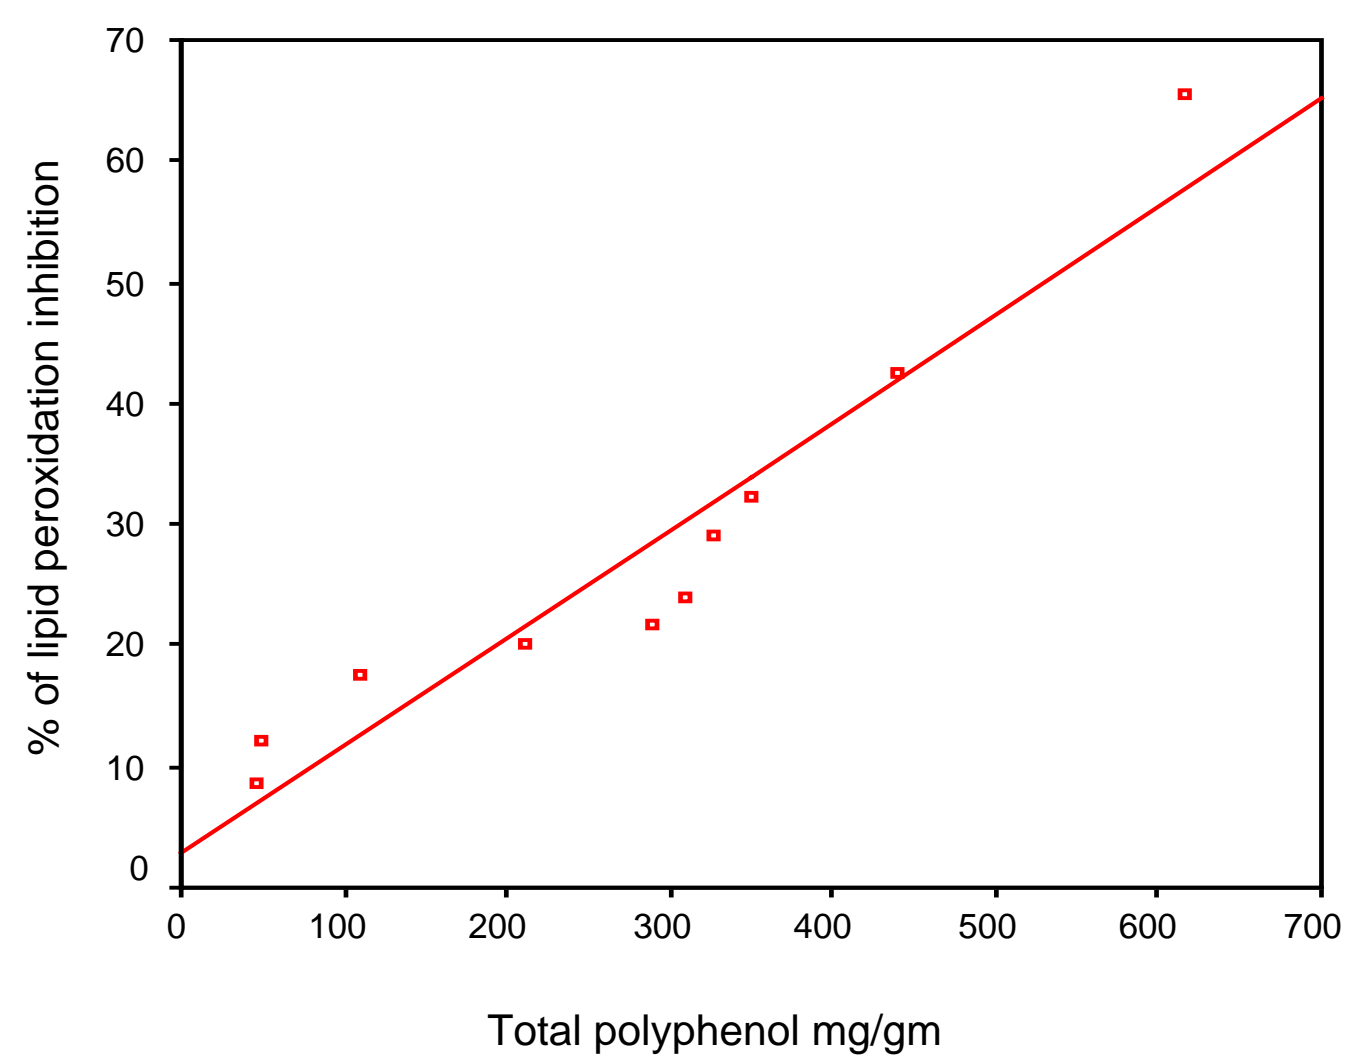

Rsq = 0.9133

E

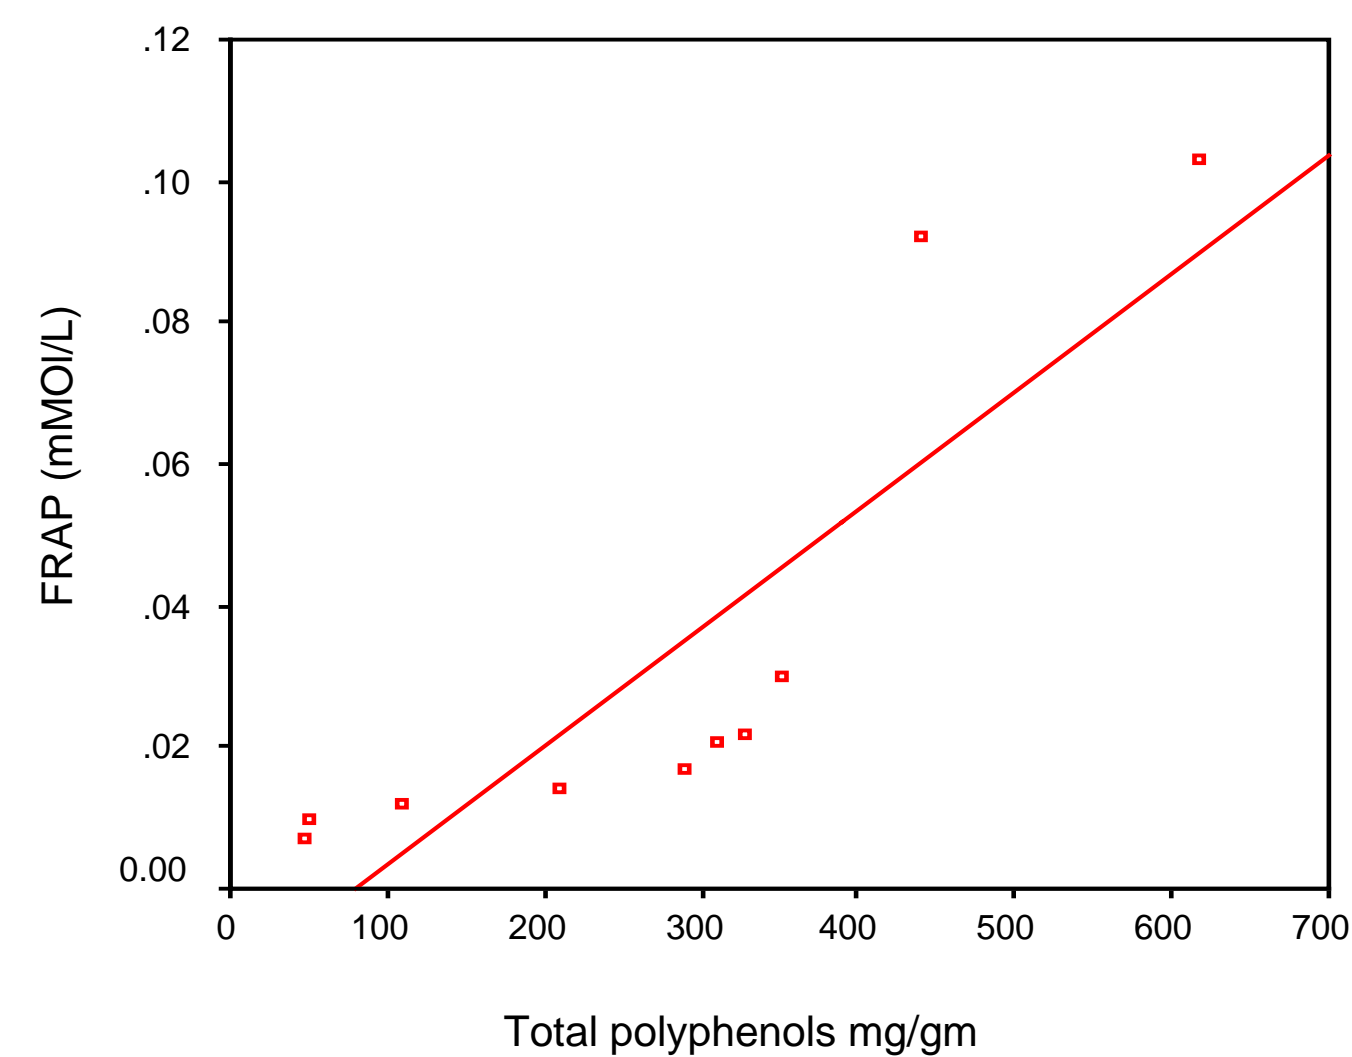

Rsq = 0.7336

C

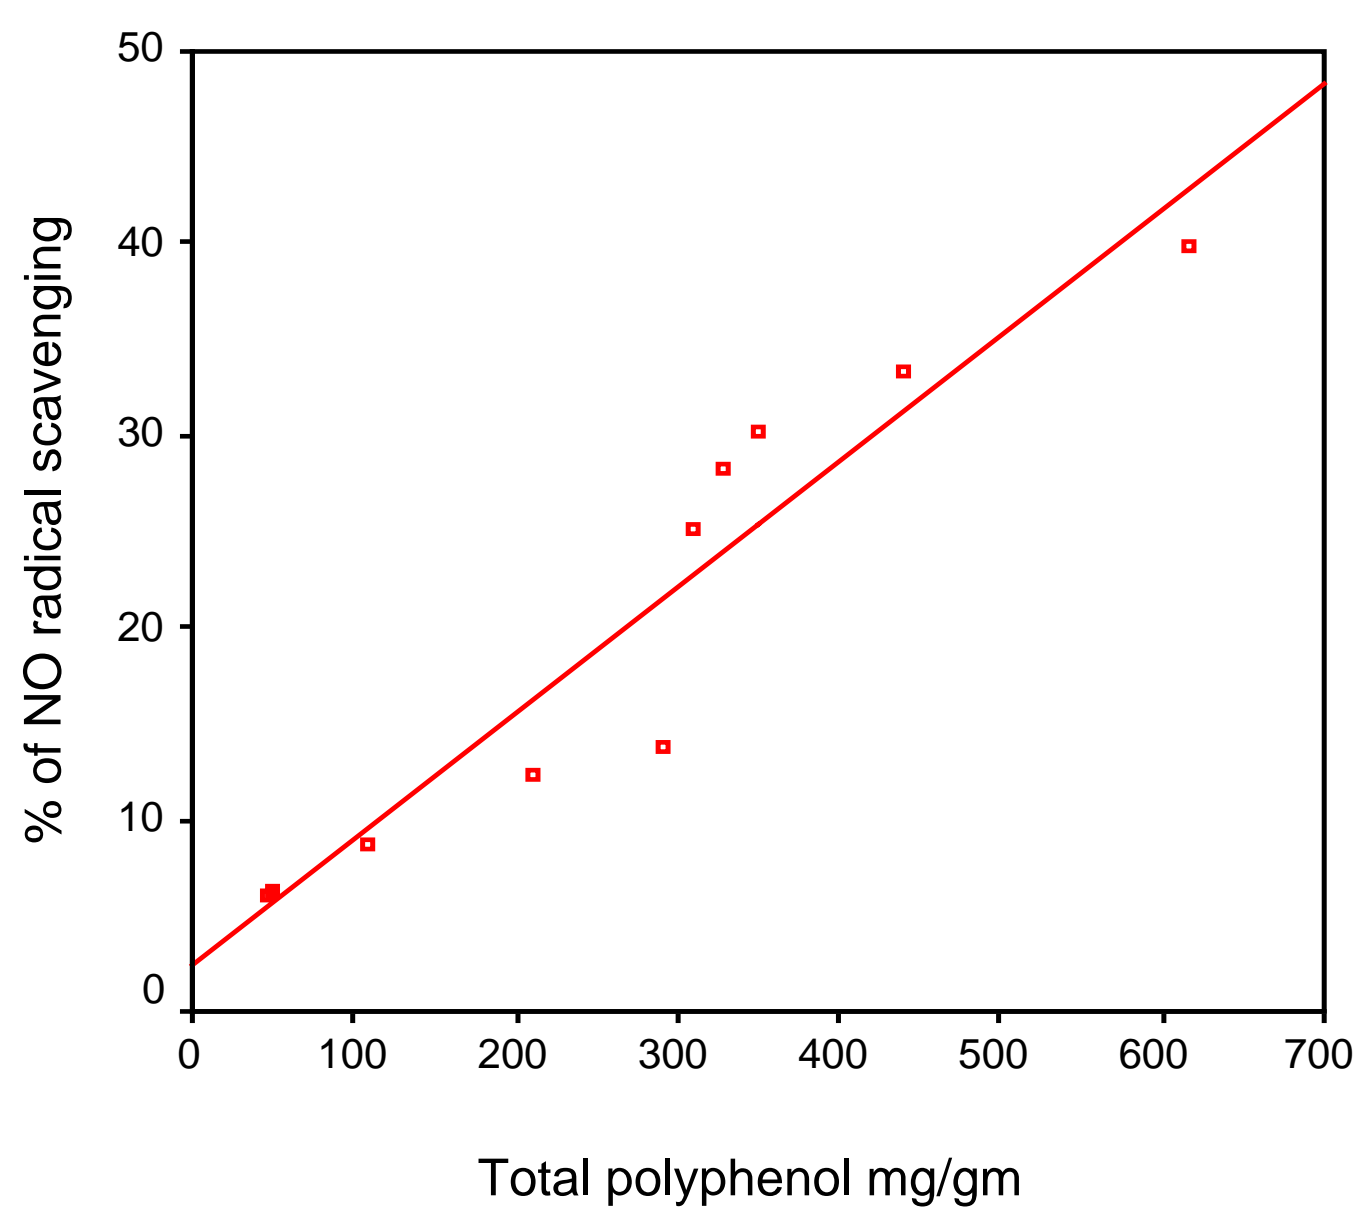

Rsq = 0.9002

F

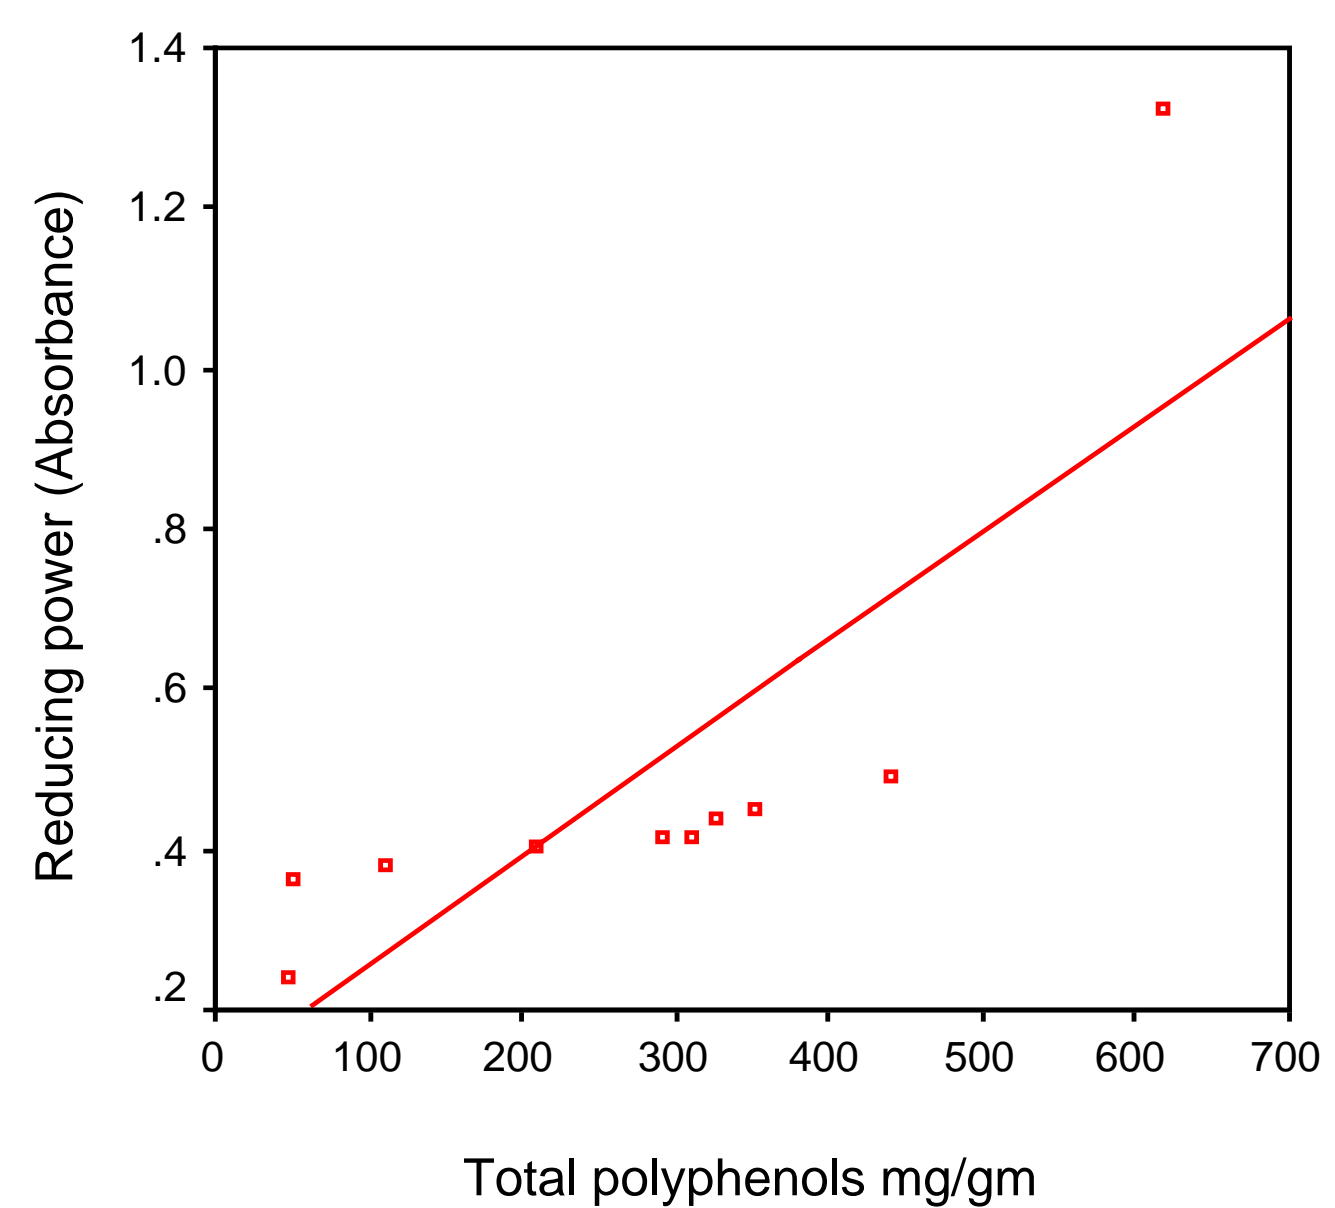

Rsq = 0.6357

Supplement: MOESM8 [file 9524252]
